# Supplementary material for: A systematic review and meta-analysis of the efficacy and safety ofN-acetylcysteine in preventing aminoglycoside-induced ototoxicity: implications for the treatment of multidrug-resistant TB
Source: HighWire-hosted journal article supplement (doi:10.1136/thoraxjnl-2015-207245), 2015-09-07
Supplement: thoraxjnl-2015-207245supp.pdf [file thoraxjnl-2015-207245supp.pdf]

**Supplement, table 1: Search strategy**

| Set    | Topic                    | Medline                                    | Embase                                      |
|--------|--------------------------|--------------------------------------------|---------------------------------------------|
| Set 1  | N-acetylcysteine         | ACETYLCYSTEINE                             | ACETYLCYESTINE or ACEYLCYSTEINE<br>DERIVATE |
| Set 2  |                          | n-acetylcysteine or acetylcysteine         | Acetylcycteine                              |
| Set 3  | Ototoxicity              | HEARING LOSS                               | HEARING IMPAIRMEN                           |
| Set 4  |                          | COCHLEA                                    | OTOTOXICITY                                 |
| Set 5  |                          | ototoxicity or cochleotoxic or<br>ototoxic | ototoxicity                                 |
| Set 6  |                          | (hearing adj1 loss)                        | (hearing adj1 loss)                         |
| Set 7  |                          | (hearing adj1 impairment)                  | (hearing adj1 impairment)                   |
| Set 8  | Long term administration | RANDOMIZED CONTROLLED TRIAL                | RANDOMIZED CONTROLLED TRIAL                 |
| Set 9  |                          | CLINICAL TRIAL                             | CLINICAL TRIAL                              |
| Set 10 |                          | OBSERVATIONAL STUDY                        | OBSERVATIONAL STUDY                         |
| Set 11 |                          | LONGITUDINAL STUDY                         | LONGITUDINAL STUDY                          |
| Set 12 |                          | COHORT STUDY                               | COHORT ANALYSIS                             |
| Set 13 |                          | (observational adj1 study)                 | (observational adj1 study)                  |
| Set 14 |                          | (longitudinal adj1 study)                  | (longitudinal adj1 study)                   |
| Set 15 |                          | (clinical adj1 trial)                      | (clinical adj1 trial)                       |
| Set 16 |                          | combine set1 and set 2 with “or”           |                                             |
| Set 17 |                          | combine set3-7 with “or”                   |                                             |
| Set 18 |                          | combine set8-15 with “or”                  |                                             |
| Set 19 |                          | combine set16-18 with “and”                |                                             |
| Set 20 |                          | Limit set19 to human                       |                                             |

Words in capital letters were searched as MESH terms and as free text terms.

Web of Science

Combination of “acetylcysteine” “ototoxic” “vertigo” “longitudinal” “randomized controlled” “clinics trial”

**Supplement Table 2: Studies reporting on long-term NAC use**

| Author, year                           | Country     | Disease or Condition          | NAC dose (mg)            | Frequency of dosing | Duration (weeks) | N (NAC) | N (placebo) | Age - NAC | N men - NAC | Age - Placebo | N men - Placebo |
|----------------------------------------|-------------|-------------------------------|--------------------------|---------------------|------------------|---------|-------------|-----------|-------------|---------------|-----------------|
| <b>Psychiatric disease</b>             |             |                               |                          |                     |                  |         |             |           |             |               |                 |
| Berk, 2012[1]                          | Australia   | Bipolar disorder              | 1000                     | 2                   | 12               | 76      | 73          | 47.1      | 16          | 44.4          | 32              |
| Berk,2008[2]                           | Australia   | Bi-polar disorder             | 1000                     | 2                   | 24               | 38      | 37          | 44.6      | 15          | 46.6          | 15              |
| Berk, 2014[3]                          | Australia   | Major depressive disorder     | 1000                     | 2                   | 12               | 135     | 134         | 49.9      | 46          | 50.5          | 54              |
| Farokhnia, 2013[4]                     | Iran        | Schizophrenia                 | 1000                     | 2                   | 8                | 23      | 23          | 32.2      | 11          | 33.4          | 13              |
| Carmeli, 2012 <sup>a</sup> [5]         | Switzerland | Schizophrenia                 | 2000                     | 1                   | 8                | 11      | 11          | 31.9      | 9           | 31.9          | 9               |
| Lavoie, 2008 <sup>a</sup> [6]          | Switzerland | Schizophrenia                 | 1000                     | 2                   | 8                | 7       | 7           | 31.9      | 5           | 31.9          | 5               |
| Berk, 2008[7]                          | Australia   | Schizophrenia                 | 1000                     | 2                   | 24               | 69      | 71          | 37.2      | 48          | 36.1          | 50              |
| Afshar, 2012[8]                        | Iran        | Obsessive compulsive disorder | 600, 1200, 2400          |                     | 12               | 24      | 24          | 30.6      | 6           | 31.3          | 6               |
| Ghanizadeh, 2013[9]                    | Iran        | Autistic disorder             | 600                      | 2                   | 8                | 20      | 20          | 8.8       | 13          | 7.9           | 12              |
| Bloch,2013[10]                         | USA         | Trichotillomania              | 1200                     | 2                   | 12               | 20      | 19          | 14        | 3           | 13.1          | 2               |
| Grant, 2009 <sup>b</sup> [11]          | USA         | Trichotillomania              | 1200 (6wks), 2400 (6wks) | 1                   | 12               | 25      | 25          | 32.7      | 4           | 35.8          |                 |
| Grant, 2007[12]                        | USA         | Pathological gambling         | 600                      | 2-3                 | 6                | 6       | 7           |           |             |               |                 |
| LaRow, 2013[13]                        | USA         | Cocaine Dependence            | 600-1200                 | 2                   | 8                | 78      | 38          | 43.5      | 58          | 43.3          | 25              |
| Gray, 2012[14]                         | USA         | Cannabis dependency           | 1200                     | 2                   | 8                | 58      | 58          | 18.9      | 39          | 18.8          | 45              |
| Grant,2010[15]                         | USA         | Methamphetamine dependence    | 600, 1200, 1800, 2400    |                     | 8                | 14      | 17          | 37.2      | 8           | 36.1          | 14              |
| <b>Respiratory disease</b>             |             |                               |                          |                     |                  |         |             |           |             |               |                 |
| Zheng, 2014[16]                        | China       | COPD                          | 600                      | 2                   | 52               | 504     | 502         | 66.2      | 415         | 66.4          | 409             |
| Tse, 2013[17]                          | Hong Kong   | COPD                          | 600                      | 2                   | 52               | 58      | 62          | 71        | 54          | 70.8          | 58              |
| de Backer, 2013 <sup>a</sup> [18]      | Belgium     | COPD                          | 600                      | 3                   | 12               | 12      | 12          | 65        | 9           | 65            | 9               |
| Patil, 2011[19]                        | India       | COPD                          | 600                      | 1,2                 | 8                | 54      | 23          |           |             |               |                 |
| Stav, 2009 <sup>a</sup> [20]           | Israel      | COPD                          | 1200                     | 1                   | 6                | 24      | 24          | 66        |             | 66            |                 |
| Schermer, 2009[21]                     | Netherlands | COPD                          | 600                      | 1                   | 24               | 96      | 96          | 59.2      | 75          | 59.6          | 65              |
| Decramer, 2005[22]                     | Europe      | COPD                          | 600                      | 1                   | 156              | 256     | 267         | 62        | 204         | 62            | 210             |
| de Benedetto, 2005[23]                 | Italy       | COPD                          | 600                      | 2                   | 8                | 32      | 23          | 66.2      |             | 66.3          |                 |
| van Overveld, 2005 <sup>a,b</sup> [24] | Poland      | COPD                          | 600                      | 1                   | 10               | 20      | 20          |           | 16          |               | 16              |
| Kasielski, 2001[25]                    | Poland      | COPD                          | 600                      | 1                   | 52               | 22      | 22          | 61        | 10          | 60            | 11              |
| Pela, 1999 <sup>b</sup> [26]           | Italy       | COPD                          | 600                      | 1                   | 24               | 85      | 84          | 66        | 60          | 66            | 68              |
| Lukas, 2005[27]                        | Germany     | Chronic bronchitis            | 600                      | 2                   | 12               | 15      | 17          | 53.6      | 9           | 58.0          | 8               |

**Supplement Table 2: Studies reporting on long-term NAC use – con't**

| Author, year                         | Country            | Disease or Condition                                                  | NAC dose (mg)             | Frequency of dosing | Duration (weeks) | N (NAC) | N (placebo) | Age - NAC | N men - NAC | Age - Placebo | N men - Placebo |
|--------------------------------------|--------------------|-----------------------------------------------------------------------|---------------------------|---------------------|------------------|---------|-------------|-----------|-------------|---------------|-----------------|
| Hansen, 1994[28]                     | Denmark            | Chronic bronchitis                                                    | 600                       | 2                   | 22               | 75      | 78          | 51.1      | 30          | 51.7          | 36              |
| Rasmussen, 1988[29]                  | Sweden             | Chronic bronchitis                                                    | 300                       | 2                   | 24               | 59      | 57          | 58.8      | 31          | 58.9          | 35              |
| Poder, 1984 <sup>b</sup> [30]        | Hungary            | Chronic bronchitis                                                    | 10mg/kg                   | 2-3                 | 12               | 27      | 18          | 0.5-3     |             | 0.5-3         |                 |
| McGavin, 1985[31]                    | UK                 | Chronic bronchitis                                                    | 200                       | 3                   | 20               | 85      | 96          | 64.3      | 75          | 62            | 80              |
| Stafanger, 1989 <sup>a</sup> [32]    | Denmark            | Cystic fibrosis with <i>P. aeruginosa</i> infection                   | 200 (<30kg), 400 (>30 kg) | 3                   | 12               | 52      | 52          | 15.8      | 17          | 15.8          | 17              |
| Stafanger, 1988 <sup>a</sup> [33]    | Denmark            | Cystic fibrosis                                                       | 200/400                   | 3/2                 | 12               | 22      | 22          | 9.5       | 23          | 9.5           | 23              |
| Ratjen, 1985[34]                     | Germany            | Cystic fibrosis                                                       | 200                       | 3                   | 10               | 12      | 12          | 13.9      | 10          | 13.9          | 10              |
| Mitchell, 1982 <sup>a</sup> [35]     | New Zealand        | Cystic fibrosis                                                       | 200                       | 3                   | 12               | 20      | 20          | 10.8      | 10          | 10.8          | 10              |
| Stafanger, 1988 <sup>a</sup> [33]    | Denmark            | Primary ciliary dyskinesia                                            | 200/400                   | 3/2                 | 12               | 8       | 8           | 29.7      | 6           | 29.7          | 6               |
| Martinez, 2014[36]                   | USA                | Idiopathic pulmonary fibrosis                                         | 600                       | 3                   | 60               | 133     | 131         | 68.3      | 107         | 67.2          | 98              |
| Demedts, 2005[37]                    | Europe             | Idiopathic pulmonary fibrosis                                         | 600                       | 3                   | 52               | 92      | 90          | 62        | 69          | 64            | 75              |
| Ghanei, 2008[38]                     | Iran               | Chronic lung disease due to mustard gas exposure                      | 600                       | 2                   | 16               | 72      | 72          | 44.9      | 32          | 46.7          | 37              |
| Van Zandwijk, 2000 <sup>b</sup> [39] | Multicentre Europe | Non-small-cell lung cancer, pT1-2, N0-1, T2N0 or cancer of the larynx | 600                       | 2                   | 104              | 642     | 641         | 61        | 556         | 60            | 559             |
| Van Schooten, 2002[40]               | Netherlands        | Smoker                                                                | 600                       | 2                   | 24               | 21      | 20          | 42        | 6           | 44            | 8               |
| <b>Blood born viruses</b>            |                    |                                                                       |                           |                     |                  |         |             |           |             |               |                 |
| Milazzo, 2010 <sup>c</sup> [41]      | Italy              | HIV, lipoatrophy                                                      | 2000                      | 1                   | 48               | 20      | 20          | 45        | 7           | 44            | 9               |
| Spada, 2002[42]                      | Brazil             | HIV                                                                   | 600                       | 1                   | 24               | 10      | 10          |           |             |               |                 |
| Breitkreutz, 2000[43]                | Germany            | HIV, not on ART                                                       | 600                       | 6, 4, 2, 1          | 28               | 16      | 13          |           | 8           |               | 8               |
| Breitkreutz, 2000[43]                | Germany            | HIV, ART                                                              | 600                       | 6, 4, 2, 1          | 28               | 21      | 16          |           | 11          |               | 10              |
| de Rosa, 2000[44]                    | USA                | HIV                                                                   | 8000                      | 1                   | 8                | 41      | 42          | 38        | 41          | 38            | 42              |
| Walmsley, 1998 <sup>d</sup> [45]     | Canada             | HIV, PCP                                                              | 3000                      | 2                   | 8                | 96      | 102         | 38.1      | 83          | 38.6          | 100             |
| Look, 1998 <sup>a,b</sup> [46]       | Germany            | HIV                                                                   | 1200                      | 1                   | 12               | 24      | 24          | 36.5      | 17          | 36.5          | 17              |
| Grant, 2000[47]                      | Spain/Italy        | HCV                                                                   | 600                       | 3                   | 24               | 73      | 74          | 39.1      | 51          | 40.9          | 53              |
| Neri, 2000 <sup>b</sup> [48]         | Italy              | HCV                                                                   | 1200                      | 2                   | 64               | 38      | 39          |           |             |               |                 |
| Look, 1999 <sup>b,e</sup> [49]       | Germany            | HCV                                                                   | 1800                      | 1                   | 24               | 8       | 8           | 35.7      | 6           | 38.7          | 3               |
| Ideo, 1999 <sup>b,e,f</sup> [50]     | Italy              | HCV                                                                   | 1200                      | 1                   | 24               | 58      | 62          | 48.3      | 33          | 46.9          | 37              |
| Cimino, 1998 <sup>b,f</sup> [51]     | Italy              | HCV                                                                   | 1200                      | 1                   | 12               | 12      | 13          | 30-62     | 8           | 23-57         | 8               |
| Tripi, 1998 <sup>b</sup> [52]        | Italy              | HCV                                                                   | 600                       | 2                   | 24               | 14      | 7           | 53.8      | 6           | 46.5          | 5               |
| Bernhard, 1998[53]                   | Switzerland        | HCV                                                                   | 600                       | 3                   | 24               | 19      | 17          |           |             |               |                 |

**Supplement Table 2: Studies reporting on long-term NAC use – con't**

| Author, year                                | Country     | Disease or Condition                  | NAC dose (mg)   | Frequency of dosing | Duration (weeks) | N (NAC) | N (placebo) | Age - NAC | N men - NAC | Age - Placebo | N men - Placebo |
|---------------------------------------------|-------------|---------------------------------------|-----------------|---------------------|------------------|---------|-------------|-----------|-------------|---------------|-----------------|
| <b>Kidney disease</b>                       |             |                                       |                 |                     |                  |         |             |           |             |               |                 |
| Purwanto, 2012[54]                          | Indonesia   | Peritoneal dialysis                   | 600             | 2                   | 8                | 16      | 16          | 45.8      | 10          | 42.5          | 11              |
| Hashemi, 2012 <sup>b</sup> [55]             | Iran        | Proteinuria, diabetes mellitus type 2 | 600             | 2                   | 8                | 35      | 35          | 60.2      | 19          | 63.4          | 20              |
| Renke, 2010/2008 <sup>a</sup> [56-57]       | Poland      | Non diabetic chronic kidney disease   | 600             | 2                   | 8                | 20      | 20          | 39.4      | 12          | 39.4          | 12              |
| Nascimento, 2009[58]                        | Brazil      | Peritoneal dialysis                   | 600             | 2                   | 8                | 12      | 10          | 57        | 5           | 54            | 4               |
| Hsu, 2009 <sup>b</sup> [59]                 | Taiwan      | Hemodialysis                          | 200             | 3                   | 12               | 38      | 227         | 57.9      | 20          | 61.3          | 107             |
| Tepel, 2003[60]                             | Germany     | Hemodialysis                          | 600             | 2                   | 58               | 64      | 70          | 63        | 33          | 62            | 43              |
| <b>Obstetric and gynaecology conditions</b> |             |                                       |                 |                     |                  |         |             |           |             |               |                 |
| Popora, 2013 <sup>b</sup> [61]              | Italy       | Endometriosis                         | 600             | 3                   | 12               | 45      | 47          | 32.9      | 0           | 32.5          | 0               |
| Hashim, 2009 <sup>i</sup> [62]              | Egypt       | Polycystic Ovary Syndrome             | 600             | 3                   | 6                | 95      | 97          | 27.3      | 0           | 26.8          | 0               |
| Elnashar, 2007 <sup>j</sup> [63]            | Egypt       | Polycystic Ovary Syndrome             | 600             | 3                   | 6                | 30      | 31          | 26.7      | 0           | 27.3          | 0               |
| Shahin, 2009 [64]                           | Egypt       | Preterm labour                        | 600             | 1                   | >12              | 140     | 140         | 26.5      | 0           | 25.9          | 0               |
| Amin, 2008 <sup>b</sup> [65]                | Egypt       | Recurrent pregnancy Loss              | 600             | 1                   | 20               | 80      | 86          | 26.2      | 0           | 25.2          | 0               |
| <b>Male infertility</b>                     |             |                                       |                 |                     |                  |         |             |           |             |               |                 |
| Safarinejad, 2009[66]                       | Iran        | Male infertility                      | 600             | 1                   | 26               | 118     | 118         | 32        | 118         | 31            | 118             |
| Ciftci, 2009[67]                            | Turkey      | Male infertility                      | 600             | 1                   | 12               | 118     | 60          | 33.1      | 60          | 32.8          | 60              |
| <b>Rheumatological conditions</b>           |             |                                       |                 |                     |                  |         |             |           |             |               |                 |
| Lai, 2012[68]                               | USA         | Lupus erythematosus                   | 600, 1200, 2400 | 3                   | 12               | 18      | 9           |           |             |               |                 |
| van Dielen, 2003[69]                        | Netherlands | Reflex sympathetic dystrophy          | 600             | 3                   | 54               | 67      | 64          | 48        | 34          | 52            | 39              |
| Perez, 2003 <sup>k</sup> [70]               | Netherlands | Regional pain syndrome                | 600             | 3                   | 17               | 74      | 71          | 50        | 29          | 49            | 20              |
| Yalcin, 2002 <sup>b</sup> [71]              | Turkey      | Blepharitis                           | 100             | 3                   | 8                | 43      | 36          | 42.9      | 8           | 43.7          | 4               |
| Currie, 1988 <sup>a,l</sup> [72]            | UK          | Young syndrome                        | 200             | 3                   | 8                | 8       | 8           | 37        | 8           | 37            | 8               |
| Furst, 1978[73]                             | USA         | Systemic sclerosis                    | 10000           |                     | 8                | 11      | 11          | 55.1      | 1           | 60.1          | 2               |
| <b>Others</b>                               |             |                                       |                 |                     |                  |         |             |           |             |               |                 |
| Kasperczyk, 2014 <sup>b</sup> [74]          | Poland      | Lead exposure                         | 200             | 1, 2, 3             | 12               | 120     | 49          |           |             |               |                 |
| Dabirmoghaddam, 2013 <sup>m</sup> [75]      | Iran        | Laryngopharyngeal Reflux              | 600             | 1                   | 12               | 30      | 30          |           |             |               |                 |
| Khoshbaten, 2010 <sup>n</sup> [76]          | Iran        | Non-alcoholic fatty liver             | 600             | 2                   | 12               | 15      | 15          | 40.1      | 6           | 46.8          | 5               |
| Martina, 2008[77]                           | Italy       | Diabetes mellitus II                  | 600             | 2                   | 24               | 12      | 12          | 62.5      | 12          | 67            | 12              |
| Pace, 2003[78]                              | USA         | Sickle cell disease                   | 200, 400, 800   | 3                   | 28               | 16      | 5           |           | 8           |               | 3               |
| Adair, 2001[79]                             | USA         | Alzheimer disease                     | 50 mg/kg/day    | 3                   | 24               | 25      | 22          |           |             |               |                 |

**Supplement Table 2: Studies reporting on long-term NAC use – con't**

| Author, year        | Country | Disease or Condition                                                  | NAC dose (mg) | Frequency of dosing | Duration (weeks) | N (NAC) | N (placebo) | Age - NAC | N men - NAC | Age - Placebo | N men - Placebo |
|---------------------|---------|-----------------------------------------------------------------------|---------------|---------------------|------------------|---------|-------------|-----------|-------------|---------------|-----------------|
| Estensen, 1999[80]  | USA     | Adenomatous colonic polyps                                            | 400           | 2                   | 12               | 34      | 30          |           |             |               |                 |
| de Flora, 1997[81]  | Italy   | Chronic degenerative disease (other than chronic respiratory disease) | 600           | 2                   | 24               | 133     | 129         | 69        | 60          | 68            | 48              |
| Ardissino, 1997[82] | Italy   | Unstable angina                                                       | 600           | 3                   | 16               | 45      | 46          | 58        | 32          | 58            | 32              |

<sup>a</sup> Cross-over trial

<sup>b</sup> No placebo in the control group

<sup>c</sup> Patients were given NAC plus lipoic acid

<sup>d</sup> All patients were treated for PCP with co-trimoxazole

<sup>e</sup> All patients received IFN, patients in the NAC also received sodium selenite

<sup>f</sup> Patients who did not respond to IFN treatment at 3 months were given NAC

<sup>g</sup> No RCT, patients were given an option to take NAC or not

<sup>h</sup> Drug administration 3 times per week

<sup>i</sup> All patients received metformin, no placebo in the control group

<sup>j</sup> Patients in the comparison group received metformin (not placebo)

<sup>k</sup> Comparison group DMSO cream

<sup>l</sup> Patients in the control group took ambroxol or bromhexine or carbocisteine

<sup>m</sup> All patients received omeprazole

<sup>n</sup> Patients in the control group took Vitamin C

**Supplement table 3: Co-morbidities, side effects, withdrawals and death in studies reporting long-term NAC use**

| Author, year                   | Total (NAC) | Total (placebo) | Exclusion criteria                                                                                                           | Co-morbidities                                  | Side effects reported    | Total Withdrawn (NAC) | Total Withdrawn (placebo) | Attributable Withdraw (NAC) | Attributable Withdraw (Placebo) | Side effects                                                                               | Death (NAC)  | Death (placebo) |
|--------------------------------|-------------|-----------------|------------------------------------------------------------------------------------------------------------------------------|-------------------------------------------------|--------------------------|-----------------------|---------------------------|-----------------------------|---------------------------------|--------------------------------------------------------------------------------------------|--------------|-----------------|
| Berk, 2012[1]                  | 76          | 73              | Systemic medical disorder, respiratory insufficiency, pregnancy, breastfeeding                                               | 49% smokers, 47% alcohol use, 21% alcohol abuse | No side effects reported | 21                    | 18                        | 1                           | 0                               |                                                                                            | Not reported | Not reported    |
| Berk, 2008[2]                  | 38          | 37              | Respiratory disease, PUD, pregnancy, breastfeeding                                                                           | 79% alcohol use, 45% smokers                    | Side effects in text     | 14                    | 13                        | Not reported                | Not reported                    |                                                                                            | Not reported | Not reported    |
| Berk, 2014[3]                  | 135         | 134             | PUD, pregnancy, breastfeeding                                                                                                | 22% CVS, 19% GI, 19% smokers, 60% alcohol use   | Side effects in text     | 38                    | 27                        | 2                           | 1                               |                                                                                            | Not reported | Not reported    |
| Farokhnia, 2013[4]             | 23          | 23              | Serious medical or neurological disorders, alcohol or substance abuse, pregnancy, lactation, hepatic and kidney disease      |                                                 | Side effects reported    | 2                     | 2                         | 0                           | 0                               |                                                                                            | Not reported | Not reported    |
| Carmeli, 2012 <sup>a</sup> [5] | 11          | 11              |                                                                                                                              |                                                 | No side effects reported | 2                     | 0                         | 0                           | 0                               |                                                                                            | Not reported | Not reported    |
| Lavoie, 2008 <sup>a</sup> [6]  | 7           | 7               |                                                                                                                              |                                                 | No side effects reported | Not reported          | Not reported              | Not reported                | Not reported                    |                                                                                            | Not reported | Not reported    |
| Berk, 2008[7]                  | 69          | 71              | Abnormal renal, hepatic, thyroid or haematological findings, pregnancy                                                       | 16% substance abuse, 53% alcohol use            | Side effects in text     | 15                    | 14                        | Not reported                | Not reported                    | "There were no significant effects of NAC on safety parameters or reported adverse events" | Not reported | Not reported    |
| Afshar, 2012[8]                | 24          | 24              | Substance abuse, pregnancy, breastfeeding, convulsive disorder, suicidal                                                     |                                                 | Side effects in text     | 5                     | 4                         | 3                           | 0                               |                                                                                            | Not reported | Not reported    |
| Ghanizadeh, 2013[9]            | 20          | 20              | Psychotic disorder, substance abuse, liver disease, seizures, hypertension, cardiac disease, unstable asthma, kidney disease |                                                 | Side effects reported    | 3                     | 6                         | 1                           | 0                               |                                                                                            | Not reported | Not reported    |

**Supplement table 3: Co-morbidities, side effects, withdrawals and death in studies reporting long-term NAC use, con't**

| Author, year    | Total (NAC) | Total (placebo) | Exclusion criteria                                                                                                                   | Co-morbidities               | Side effects reported    | Total Withdrawn (NAC) | Total Withdrawn (placebo) | Attributable Withdraw (NAC) | Attributable Withdraw (Placebo) | Side effects                                                                                                                                                                                                                                                                       | Death (NAC)  | Death (placebo) |
|-----------------|-------------|-----------------|--------------------------------------------------------------------------------------------------------------------------------------|------------------------------|--------------------------|-----------------------|---------------------------|-----------------------------|---------------------------------|------------------------------------------------------------------------------------------------------------------------------------------------------------------------------------------------------------------------------------------------------------------------------------|--------------|-----------------|
| Bloch, 2013[10] | 20          | 19              | Bipolar, psychotic, substance abuse, development disorder, mental retardation, pregnancy                                             |                              | Side effects in text     | 4                     | 0                         | 1                           | 0                               |                                                                                                                                                                                                                                                                                    | Not reported | Not reported    |
| Grant, 2009[11] | 25          | 25              | Unstable medical disease, abnormal laboratory tests, pregnancy, breastfeeding                                                        | 60% psychiatric co-morbidity | Side effects reported    | 3                     | 3                         | Not reported                | Not reported                    |                                                                                                                                                                                                                                                                                    | Not reported | Not reported    |
| Grant, 2007[12] | 6           | 7               | Abnormal physical examination                                                                                                        |                              | No side effects reported | Not reported          | Not reported              | Not reported                | Not reported                    |                                                                                                                                                                                                                                                                                    | Not reported | Not reported    |
| LaRow, 2013[13] | 78          | 38              | Substance abuse, pregnancy, breastfeeding, serious medical condition, asthma                                                         | 36% alcohol abuse,           | Side effects reported    | 38                    | 17                        | 3                           | 0                               |                                                                                                                                                                                                                                                                                    | Not reported | Not reported    |
| Gray, 2012[14]  | 58          | 58              | Co-morbid substance abuse, unstable psychiatric disease, pregnancy                                                                   | 14% psychiatric co-morbidity | Side effects in text     | 21                    | 25                        | Not reported                | Not reported                    | "There were no FDA-defined serious adverse events and there were no significant differences between the two treatment groups in the occurrence of any adverse events (38 adverse events in 24 participants receiving NAC, 46 adverse events in 27 participants receiving placebo)" | Not reported | Not reported    |
| Grant, 2010[15] | 14          | 17              | Medical disease, pregnancy, suicidal, bipolar disorder, dementia, psychotic disorder, abnormal liver function tests, substance abuse |                              | Side effects in text     | 5                     | 9                         | Not reported                | Not reported                    | "Rates of side effects did not significantly differ between groups (57.1% NAC vs 41.5% placebo)"                                                                                                                                                                                   | Not reported | Not reported    |

**Supplement table 3: Co-morbidities, side effects, withdrawals and death in studies reporting long-term NAC use, con't**

| Author, year        | Total (NAC) | Total (placebo) | Exclusion criteria                                                                                                                                                | Co-morbidities | Side effects reported    | Withdrawn (NAC) | Withdrawn (placebo) | Attributable Withdraw (NAC) | Attributable Withdraw (Placebo) | Side effects                                                                                                                                               | Death (NAC)  | Death (placebo) |
|---------------------|-------------|-----------------|-------------------------------------------------------------------------------------------------------------------------------------------------------------------|----------------|--------------------------|-----------------|---------------------|-----------------------------|---------------------------------|------------------------------------------------------------------------------------------------------------------------------------------------------------|--------------|-----------------|
| Zheng,, 2014[16]    | 504         | 502             | Asthma, long term oxygen                                                                                                                                          | 18% smokers    | Side effects reported    | 124             | 119                 | 32                          | 24                              |                                                                                                                                                            | Not reported | Not reported    |
| Tse, 2013[17]       | 58          | 62              | Co-existing pulmonary disease, severe dyspnoea                                                                                                                    |                | Side effects in text     | 4               | 5                   | 0                           | 0                               | "No major adverse effects occurred in either group. There was no increase in incidence of minor adverse effects with NAC (3/58, 5%) vs placebo (5/62, 8%)" | 2            | 1               |
| de Backer, 2013[18] | 12          | 12              | Exacerbation during the last 8 weeks, PUD, steroids, pregnancy, breastfeeding                                                                                     |                | No side effects reported | Not reported    | Not reported        | Not reported                | Not reported                    |                                                                                                                                                            | Not reported | Not reported    |
| Patil, 2011[19]     | 54          | 23              | Decompensated cardiovascular, endocrine, hepatic or renal function, parenchymal lung pathology, active infection due to M tuberculosis, gastric or duodenal ulcer |                | Side effects in text     | Not reported    | Not reported        | Not reported                | Not reported                    | "Nausea and stomatitis were the most common adverse reactions"                                                                                             | Not reported | Not reported    |
| Stav, 2009[20]      | 24          | 24              | Asthma, long term oxygen                                                                                                                                          |                | Side effects in text     | Not reported    | Not reported        | Not reported                | Not reported                    | "Apart from mild epigastric discomfort that was reported by a few patients in the treated group, no other complaints or findings were recorded"            | Not reported | Not reported    |
| Schermer, 2009[21]  | 96          | 96              | Asthma, allergic rhinitis, eczema                                                                                                                                 |                | No side effects reported | 44              | 40                  | 4                           | 4                               |                                                                                                                                                            | 1            | 3               |



**Supplement table 3: Co-morbidities, side effects, withdrawals and death in studies reporting long-term NAC use, con't**

| Author, year           | Total (NAC) | Total (placebo) | Exclusion criteria                                                                                           | Co-morbidities | Side effects reported    | Withdrawn (NAC) | Withdrawn (placebo) | Attributable Withdraw (NAC) | Attributable Withdraw (Placebo) | Side effects                                                                                                                | Death (NAC)  | Death (placebo) |
|------------------------|-------------|-----------------|--------------------------------------------------------------------------------------------------------------|----------------|--------------------------|-----------------|---------------------|-----------------------------|---------------------------------|-----------------------------------------------------------------------------------------------------------------------------|--------------|-----------------|
| Decramer, 2005[22]     | 256         | 267             | Long term, PUD, congestive heart failure, oral steroids, cystic fibrosis, bronchiectasis, past history of TB |                | Side effects in text     | 70              | 99                  | 19                          | 26                              | "1428 adverse events in NAC group, 1381 adverse events in placebo group, no adverse events were thought to be drug-related" | Not reported | Not reported    |
| de Benedetto, 2005[23] | 32          | 23              | Neoplasma, DIP, pulmonary disease                                                                            |                | No side effects reported | Not reported    | Not reported        | Not reported                | Not reported                    |                                                                                                                             | Not reported | Not reported    |
| van Overveld, 2005[24] | 20          | 20              | Atopy, asthma, hepatic or renal failure, cystic fibrosis, CVS                                                |                | No side effects reported | not reported    | not reported        | Not reported                | Not reported                    |                                                                                                                             | Not reported | Not reported    |
| Kasielski, 2001[25]    | 22          | 22              | Alcohol or substance abuse                                                                                   |                | Side effects in text     | not reported    | not reported        | Not reported                | Not reported                    | "The number of adverse events was low: two in the NAC group and three in the placebo group"                                 | Not reported | Not reported    |
| Pela, 1999[26]         | 85          | 84              | Lung cancer, cardiomyopathy, metabolic disease, chronic renal disease                                        | 28% smokers    | Side effects in text     | 2               | 3                   | 1                           | 0                               | "NAC was well tolerated. There was no difference in side effects reported in both groups"                                   | 0            | 1               |
| Lukas, 2005[27]        | 17          | 15              |                                                                                                              |                | No side effects reported | 8               | 10                  | Not reported                | Not reported                    |                                                                                                                             | Not reported | Not reported    |
| Hansen, 1994[28]       | 75          | 78              | Eosinophilia, positive skin test to allergens, long term antibiotic treatment                                |                | Side effects in text     | 16              | 8                   | Not reported                | Not reported                    | "There were no serious adverse events during the study"                                                                     | Not reported | Not reported    |
| Rasmussen, 1988[29]    | 59          | 57              | Pregnancy, antibiotics                                                                                       |                | Side effects reported    | 10              | 7                   | 10                          | 7                               |                                                                                                                             | Not reported | Not reported    |
| Poder, 1984[30]        | 27          | 18              |                                                                                                              |                | Side effects in text     | Not reported    | Not reported        | Not reported                | Not reported                    | "No side effects were observed"                                                                                             | Not reported | Not reported    |
| McGavin, 1985[31]      | 85          | 96              | Bronchiectasis, insulin dependent DM, PUD, pregnancy                                                         | 27% smokers    | Side effects reported    | 13              | 20                  | 1                           | 2                               |                                                                                                                             | 3            | 2               |

**Supplement table 3: Co-morbidities, side effects, withdrawals and death in studies reporting long-term NAC use, con't**

| Author, year                      | Total (NAC) | Total (placebo) | Exclusion criteria                                                                                                                | Co-morbidities                  | Side effects reported    | Withdrawn (NAC) | Withdrawn (placebo) | Attributable Withdraw (NAC) | Attributable Withdraw (Placebo) | Side effects                                                                                                                                                                                                   | Death (NAC)  | Death (placebo) |
|-----------------------------------|-------------|-----------------|-----------------------------------------------------------------------------------------------------------------------------------|---------------------------------|--------------------------|-----------------|---------------------|-----------------------------|---------------------------------|----------------------------------------------------------------------------------------------------------------------------------------------------------------------------------------------------------------|--------------|-----------------|
| Stafanger, 1989 <sup>1</sup> [32] | 52          | 52              | PUD, liver of kidney disease, pregnancy                                                                                           |                                 | No side effects reported | Not reported    | Not reported        | Not reported                | Not reported                    |                                                                                                                                                                                                                | Not reported | Not reported    |
| Stafanger, 1988[33]               | 22          | 22              | PUD, liver of kidney disease, pregnancy                                                                                           |                                 | Side effects reported    | Not reported    | Not reported        | Not reported                | Not reported                    |                                                                                                                                                                                                                | Not reported | Not reported    |
| Ratjen, 1985[34]                  | 12          | 12              | Atopy, bronchodilators                                                                                                            |                                 | Side effects in text     | 3               | 1                   | Not reported                | Not reported                    | "No side effects of active therapy were noted"                                                                                                                                                                 | Not reported | Not reported    |
| Mitchell, 1982[35]                | 20          | 20              |                                                                                                                                   |                                 | Side effects in text     | 2               | 2                   | 0                           | 0                               | "No side effects were noticed for either placebo or NAC"                                                                                                                                                       | Not reported | Not reported    |
| Stafanger, 1988[33]               | 8           | 8               | PUD, liver of kidney disease, pregnancy                                                                                           |                                 | Side effects reported    | 9               | 12                  | 1                           | 1                               |                                                                                                                                                                                                                | Not reported | Not reported    |
| Martinez, 2014[36]                | 133         | 131             | Non-idiopathic fibrotic lung disease, coexisting medical disease, on the waiting list of a lung transplant                        | 23% CVS, 19% diabetes, 61% GERD | Side effects reported    | 23              | 20                  | 1                           | 4                               |                                                                                                                                                                                                                | Not reported | Not reported    |
| Demedts, 2005[37]                 | 92          | 90              | Prednisolone dose >0.5mg/kg                                                                                                       |                                 | Side effects reported    | 16              | 16                  | 2                           | 2                               |                                                                                                                                                                                                                | 7            | 8               |
| Ghanei, 2008[38]                  | 72          | 72              | Pneumonia, history of TB, smoking, substance abuse                                                                                |                                 | No side effects reported | Not reported    | Not reported        | Not reported                | Not reported                    |                                                                                                                                                                                                                | Not reported | Not reported    |
| Van Zandwijk, 2000[39]            | 642         | 641             | Recurrent disease, synchronous multiple tumours, previous malignant disease, abnormal LFTs, abnormal renal function, DM, HTN, PUD | 93% smokers                     | Side effects reported    | 115             | Not applicable      | Not reported                | Not reported                    | "No comparison of side effects to the non-treatment groups (the control group did not receive any placebo), GI and skin side effects were similar in the groups receiving NAC, NAC+Retinyl and Retinyl alone." | 167          | 147             |
| Van Schooten, 2002[40]            | 21          | 20              |                                                                                                                                   |                                 | No side effects reported | Not reported    | Not reported        | Not reported                | Not reported                    |                                                                                                                                                                                                                | Not reported | Not reported    |

**Supplement table 3: Co-morbidities, side effects, withdrawals and death in studies reporting long-term NAC use, con't**

| Author, year          | Total (NAC) | Total (placebo) | Exclusion criteria                                                                                                                   | Co-morbidities                                                           | Side effects reported    | Withdrawn (NAC) | Withdrawn (placebo) | Attributable Withdraw (NAC) | Attributable Withdraw (Placebo) | Side effects                                                                  | Death (NAC)  | Death (placebo) |
|-----------------------|-------------|-----------------|--------------------------------------------------------------------------------------------------------------------------------------|--------------------------------------------------------------------------|--------------------------|-----------------|---------------------|-----------------------------|---------------------------------|-------------------------------------------------------------------------------|--------------|-----------------|
| Milazzo, 2010[41]     | 20          | 20              | Neoplastic disease, alcohol abuse                                                                                                    | Median CD4 count 490 (NAC) and 524 (placebo)                             | Side effects in text     | Not reported    | Not reported        | Not reported                | Not reported                    | "Two patients reported insomnia one in the NAC and one in the control group." | Not reported | Not reported    |
| Spada, 2002[42]       | 10          | 10              |                                                                                                                                      |                                                                          | No side effects reported | Not reported    | Not reported        | Not reported                | Not reported                    |                                                                               | Not reported | Not reported    |
| Breitkreutz, 2000[43] | 21          | 16              | CD4 >200, endocrine disease, liver cirrhosis, serum creatine >1.5 mg/dl, cardiorespiratory insufficiency, substance or alcohol abuse |                                                                          | No side effects reported | 3               | 2                   | 0                           | 0                               |                                                                               | Not reported | Not reported    |
| Breitkreutz, 2000[43] | 16          | 13              | CD4 200-500, endocrine disease, liver cirrhosis, serum creatine >1.5 mg/dl, cardiorespiratory insufficiency, alcohol or drug abuse   |                                                                          | No side effects reported | 2               | 0                   | 0                           | 0                               |                                                                               | Not reported | Not reported    |
| de Rosa, 2000[44]     | 41          | 42              | CD4>500                                                                                                                              | Mean CD4 count 203 (NAC), 160 (placebo)                                  | Side effects in text     | 10              | 12                  | Not reported                | Not reported                    | "No evidence of toxicity associated with NAC administration was found"        | Not reported | Not reported    |
| Walmsley, 1998 [45]   | 96          | 102             | CD4>200                                                                                                                              | Concurrent cotrimoxazole use, mean CD4 count 148 (NAC) and 160 (control) | Side effects reported    | 23              | 17                  | 11                          | Not reported                    |                                                                               | Not reported | Not reported    |
| Look, 1998[46]        | 24          | 24              | CD4<200, opportunistic infection, abnormal laboratory findings                                                                       |                                                                          | No side effects reported | Not reported    | Not reported        | Not reported                | Not reported                    |                                                                               | Not reported | Not reported    |
| Grant, 2000[47]       | 73          | 74              | HIV/HBV co-infection                                                                                                                 |                                                                          | No side effects reported | not reported    | not reported        | Not reported                | Not reported                    |                                                                               | Not reported | Not reported    |

**Supplement table 3: Co-morbidities, side effects, withdrawals and death in studies reporting long-term NAC use, con't**

| Author, year             | Total (NAC) | Total (placebo) | Exclusion criteria                                                                                                                               | Co-morbidities | Side effects reported    | Withdrawn (NAC) | Withdrawn (placebo) | Attributable Withdraw (NAC) | Attributable Withdraw (Placebo) | Side effects                                                                                           | Death (NAC)  | Death (placebo) |
|--------------------------|-------------|-----------------|--------------------------------------------------------------------------------------------------------------------------------------------------|----------------|--------------------------|-----------------|---------------------|-----------------------------|---------------------------------|--------------------------------------------------------------------------------------------------------|--------------|-----------------|
| Neri, 2000[48]           | 39          | 38              | Renal insufficiency, cancer, respiratory distress, alcohol abuse, obesity, DM                                                                    |                | Side effects in text     | Not reported    | Not reported        | Not reported                | Not reported                    | "No adverse reaction to, nor side effects of, treatment, necessitated suspension of IFN or NAC"        | Not reported | Not reported    |
| Look, 1999 [49]          | 8           | 8               | Cirrhosis, prior IFN treatment, renal disorder, HIV/HBV coinfection, other causes of chronic liver disease, contraindication against IFN-therapy |                | Side effects in text     | Not reported    | Not reported        | 0                           | 0                               | "The medication was well tolerated by all patients and no patient stopped therapy due to side effects" | Not reported | Not reported    |
| Ideo, 1999[50]           | 58          | 62              | Decompensated cirrhosis, steroid therapy, HIV co-infection, drug addiction, psychosis, malignancy                                                |                | Side effects reported    | 9               | 10                  | 9                           | 10                              |                                                                                                        | Not reported | Not reported    |
| Cimino, 1998[51]         | 12          | 13              |                                                                                                                                                  |                | No side effects reported | Not reported    | Not reported        | Not reported                | Not reported                    |                                                                                                        | Not reported | Not reported    |
| Tripi, 1998 [52]         | 14          | 7               |                                                                                                                                                  |                | No side effects reported | 0               | 0                   | 0                           | 0                               | "No serious side effects were observed"                                                                | Not reported | Not reported    |
| Bernhard, 1998[53]       | 19          | 17              |                                                                                                                                                  |                | No side effects reported | Not reported    | Not reported        | Not reported                | Not reported                    |                                                                                                        | Not reported | Not reported    |
| Purwanto, 2012[54]       | 16          | 16              | Stage V diabetic nephropathy, steroids, malignancy, obstructive uropathy                                                                         |                | No side effects reported | Not reported    | Not reported        | Not reported                | Not reported                    |                                                                                                        | Not reported | Not reported    |
| Hashemi, 2012[55]        | 35          | 35              | Creatinine > 1.8mg/dl                                                                                                                            |                | No side effects reported | Not reported    | Not reported        | Not reported                | Not reported                    |                                                                                                        | Not reported | Not reported    |
| Renke, 2010/2008 [56-57] | 20          | 20              | Steroids or immunosuppressive therapy                                                                                                            |                | Side effects in text     | 1               | 1                   | Not reported                | Not reported                    | "NAC therapy was well tolerated by all patients. Adverse effects were not reported"                    | Not reported | Not reported    |

**Supplement table 3: Co-morbidities, side effects, withdrawals and death in studies reporting long-term NAC use, con't**

| Author, year         | Total (NAC) | Total (placebo) | Exclusion criteria                                                                                                              | Co-morbidities                                        | Side effects reported    | Withdrawn (NAC) | Withdrawn (placebo) | Attributable Withdraw (NAC) | Attributable Withdraw (Placebo) | Side effects                                                                                               | Death (NAC)  | Death (placebo) |
|----------------------|-------------|-----------------|---------------------------------------------------------------------------------------------------------------------------------|-------------------------------------------------------|--------------------------|-----------------|---------------------|-----------------------------|---------------------------------|------------------------------------------------------------------------------------------------------------|--------------|-----------------|
| Nascimento, 2009[58] | 12          | 10              | Chronic inflammatory disease, DM, active infection, hepatitis B or C                                                            |                                                       | No side effects reported | Not reported    | Not reported        | Not reported                | Not reported                    |                                                                                                            | Not reported | Not reported    |
| Hsu, 2009[59]        | 38          | 227             | Vitamin C, malignancy, active infections, haematological disorders, recent blood transfusion or surgery, renal transplantation  | 44% diabetic nephropathy                              | No side effects reported | 14              | not reported        | Not reported                | Not reported                    |                                                                                                            | Not reported | Not reported    |
| Tepel, 2003[60]      | 64          | 70              |                                                                                                                                 | 31% DM                                                | Side effects in text     | Not reported    | Not reported        | Not reported                | Not reported                    | "Five patients (8%) reported GI discomfort during treatment with NAC. No major side effects were observed" | 14           | 14              |
| Popora, 201[61]      | 45          | 47              | Steroids                                                                                                                        |                                                       | Side effects in text     | Not reported    | Not reported        | Not reported                | Not reported                    | "NAC was well tolerated by all patients and no adverse reactions were reported"                            | Not reported | Not reported    |
| Hashim, 2009[62]     | 95          | 97              | Other causes of infertility, DM, smoking, alcohol use, age>40                                                                   |                                                       | No side effects reported | 0               | 0                   | 0                           | 0                               |                                                                                                            | Not reported | Not reported    |
| Elnashar, 2007[63]   | 30          | 31              | History of pelvic pelvic surgery, infertility other than anovulation, endocrine disorders                                       |                                                       | No side effects reported | 2               | 1                   | 2                           | 1                               |                                                                                                            | Not reported | Not reported    |
| Shahin, 2009[64]     | 140         | 140             | >35 years, <20 years, threatened abortion in the current pregnancy                                                              | Pregnant (mean gestational age 17wks)                 | Side effects reported    | 16              | 0                   | 16                          | 10                              |                                                                                                            | Not reported | Not reported    |
| Amin, 2008[65]       | 80          | 86              | Consanguineous marriage, uterine anatomic abnormality, positive antibodies for antiphospholipid syndrome, endocrine abnormality | Pregnant (treatment started once pregnancy confirmed) | Side effects in text     | 2               | 0                   | Not reported                | Not reported                    |                                                                                                            | Not reported | Not reported    |

**Supplement table 3: Co-morbidities, side effects, withdrawals and death in studies reporting long-term NAC use, con't**

| Author, year          | Total (NAC) | Total (placebo) | Exclusion criteria                                                                                                          | Co-morbidities | Side effects reported    | Withdrawn (NAC) | Withdrawn (placebo) | Attributable Withdraw (NAC) | Attributable Withdraw (Placebo) | Side effects                                                                                                                                                         | Death (NAC)  | Death (placebo) |
|-----------------------|-------------|-----------------|-----------------------------------------------------------------------------------------------------------------------------|----------------|--------------------------|-----------------|---------------------|-----------------------------|---------------------------------|----------------------------------------------------------------------------------------------------------------------------------------------------------------------|--------------|-----------------|
| Safarinejad, 2009[66] | 118         | 118             | History of cancer, genital disease, STI, smokers, hepatobiliary disease, renal disease, neurological or psychiatric disease |                | Side effects in text     | 13              | 12                  | 0                           | 0                               |                                                                                                                                                                      | Not reported | Not reported    |
| Ciftci, 2009[67]      | 60          | 60              | Varicocele, leukospermia, hormonal abnormalities, obstruction                                                               |                | Side effects in text     | 0               | 0                   | 0                           | 00                              | "None of the patients in the present study reported any side effects with use of the drug"                                                                           | Not reported | Not reported    |
| Lai, 2012[68]         | 18          | 9               | Pregnancy, breastfeeding, chronic infection, serious co-morbidities (e.g. diabetes)                                         |                | No side effects reported | Not reported    | Not reported        | Not reported                | Not reported                    |                                                                                                                                                                      | Not reported | Not reported    |
| van Dieten, 2003[69]  | 67          | 64              |                                                                                                                             |                | No side effects reported | 5               | 3                   | Not reported                | Not reported                    |                                                                                                                                                                      | Not reported | Not reported    |
| Perez, 2003[70]       | 74          | 71              | More than one limb involved, surgery, pregnancy                                                                             | 37% smokers    | Side effects in text     | 18              | 15                  | Not reported                | Not reported                    | "The most prominent side effects were sulphur like taste and stomach reaction"                                                                                       | Not reported | Not reported    |
| Yalcin, 2002[71]      | 43          | 36              |                                                                                                                             |                | Side effects in text     | 1               | 0                   | 1                           | 0                               | "In one patient oral NAC was discontinued because of diarrhoea. Other side effects of the drug included minor nausea in one patient and minor nasal leak in another" | Not reported | Not reported    |
| Currie, 1988[72]      | 8           | 8               |                                                                                                                             |                | No side effects reported | Not reported    | Not reported        | Not reported                | Not reported                    |                                                                                                                                                                      | Not reported | Not reported    |
| Furst, 1978[73]       | 11          | 11              | Malignant hypertension, acute renal failure                                                                                 |                | Side effects in text     | 4               | 4                   | 3                           | 1                               |                                                                                                                                                                      | Not reported | Not reported    |

**Supplement table 3: Co-morbidities, side effects, withdrawals and death in studies reporting long-term NAC use, con't**

| Author, year            | Total (NAC) | Total (placebo) | Exclusion criteria                                                                                                                                                           | Co-morbidities                              | Side effects reported    | Withdrawn (NAC) | Withdrawn (placebo) | Attributable Withdraw (NAC) | Attributable Withdraw (Placebo) | Side effects                                                | Death (NAC)  | Death (placebo) |
|-------------------------|-------------|-----------------|------------------------------------------------------------------------------------------------------------------------------------------------------------------------------|---------------------------------------------|--------------------------|-----------------|---------------------|-----------------------------|---------------------------------|-------------------------------------------------------------|--------------|-----------------|
| Kasperczyk, 2014[74]    | 120         | 49              |                                                                                                                                                                              | 55% smokers                                 | No side effects reported | Not reported    | Not reported        | Not reported                | Not reported                    |                                                             | Not reported | Not reported    |
| Dabirmoghadam, 2013[75] | 30          | 30              | <12, positive history of drug reaction to NAC, history of previous reflux treatment, laryngeal cancer                                                                        |                                             | No side effects reported | Not reported    | Not reported        | Not reported                | Not reported                    |                                                             | Not reported | Not reported    |
| Khoshbaten, 2010[76]    | 15          | 15              |                                                                                                                                                                              |                                             | No side effects reported | Not reported    | Not reported        | Not reported                | Not reported                    |                                                             | Not reported | Not reported    |
| Martina, 2008[77]       | 12          | 12              | Women, smokers, secondary hypertension, cancer, hepatic, pulmonary, renal disease, psychiatric disorder                                                                      |                                             | Side effects in text     | 1               | 1                   | Not reported                | Not reported                    | "No adverse events were noted during the treatment"         | Not reported | Not reported    |
| Pace, 2003[78]          | 16          | 5               | <15, pregnancy, history of stroke, HIV                                                                                                                                       |                                             | No side effects reported | Not reported    | Not reported        | Not reported                | Not reported                    |                                                             | Not reported | Not reported    |
| Adair, 2001[79]         | 25          | 22              | Dementia, alcohol or substance abuse, major depressive disorder, Hachinski ischemic score >4                                                                                 |                                             | Side effects reported    | 2               | 2                   | 0                           | 0                               |                                                             | Not reported | Not reported    |
| Estensen, 1999[80]      | 34          | 30              |                                                                                                                                                                              |                                             | Side effects in text     | 1               | 1                   | 1                           | 0                               | "Only one patient reported an adverse reaction (headaches)" | Not reported | Not reported    |
| de Flora, 1997[81]      | 133         | 129             | Chronic respiratory disease                                                                                                                                                  | 11% smokers                                 | Side effects reported    | 7               | 7                   | 1                           | 1                               |                                                             | Not reported | Not reported    |
| Ardissino, 1997[82]     | 45          | 46              | >75, coronary artery bypass, valvular heart disease, congenital heart disease, symptomatic cerebrovascular disease, anaemia, fever, infections, hypertension, thyrotoxicosis | 30% smokers, 5% diabetics, 53% hypertension | Side effects reported    | 8               | 4                   | Not reported                | Not reported                    |                                                             | Not reported | Not reported    |

**Supplement table 4: Specific side effects in studies reporting on long-term NAC use**

[illegible]



**Supplement table 4: Specific side effects in studies reporting on long-term NAC use, con't**

| Author, year        | Total (NAC) | Total (placebo) | Abdominal pain (NAC) | Abdominal pain (Placebo) | Nausea vomiting (NAC) | Nausea vomiting (Placebo) | Diarrhoea (NAC) | Diarrhoea (Placebo) | Headache (NAC) | Headache (Placebo) | Arthralgia (NAC) | Arthralgia (Placebo) | Rash (NAC) | Rash (Placebo) | Dizziness (NAC) | Dizziness (Placebo) | Cramps (NAC) | Cramps (Placebo) | Drowsiness (NAC) | Drowsiness (Placebo) |
|---------------------|-------------|-----------------|----------------------|--------------------------|-----------------------|---------------------------|-----------------|---------------------|----------------|--------------------|------------------|----------------------|------------|----------------|-----------------|---------------------|--------------|------------------|------------------|----------------------|
| Pela, 1999[26]      | 85          | 84              | 2                    | 2                        |                       |                           | 1               | 0                   |                |                    |                  |                      | 0          | 1              |                 |                     |              |                  |                  |                      |
| Rasmussen, 1988[29] | 59          | 57              | 10                   | 6                        |                       |                           |                 |                     |                |                    |                  |                      | 5          | 4              |                 |                     |              |                  |                  |                      |
| Shahin, 2009[64]    | 140         | 140             | 28                   | 0                        | 26                    | 0                         |                 |                     |                |                    |                  |                      |            |                |                 |                     |              |                  |                  |                      |
| Stafanger, 1989[32] | 52          | 52              | 1                    | 1                        |                       |                           |                 |                     |                |                    |                  |                      | 1          | 0              |                 |                     |              |                  |                  |                      |
| Walmsley, 1998[45]  | 96          | 102             |                      |                          | 4                     | 1                         |                 |                     |                |                    |                  |                      | 20         | 25             |                 |                     |              |                  |                  |                      |
| Zheng, 2014[16]     | 504         | 502             | 15                   | 17                       |                       |                           | 5               | 3                   |                |                    | 2                | 0                    |            |                | 4               | 9                   |              |                  |                  |                      |
| Ardissino, 1997[82] | 45          | 46              | 5                    | 0                        |                       |                           | 4               | 0                   | 1              | 2                  |                  |                      |            |                |                 |                     |              |                  |                  |                      |
| LaRowe, 2013[13]    | 78          | 33              | 31                   | 19                       |                       |                           |                 |                     | 12             | 3                  | 6                | 2                    | 5          | 5              |                 |                     |              |                  | 4                | 3                    |

**Supplement table 5: Risk of bias assessment for studies reporting on long-term NAC use**

| Author, year                 | Sequence generation | Allocation concealment | Blinding-participant | Blinding-investigator | Complete outcome data - side effect | Complete outcome data - withdraw | complete outcome data - death | Selective outcome reporting |
|------------------------------|---------------------|------------------------|----------------------|-----------------------|-------------------------------------|----------------------------------|-------------------------------|-----------------------------|
| Berk, 2012[1]                | Low risk            | Low risk               | Low risk             | Low risk              | Unclear                             | Unclear                          | Unclear                       | Unclear                     |
| Berk,2008[2]                 | Low risk            | Low risk               | Low risk             | Low risk              | Low risk                            | Low risk                         | Unclear                       | Unclear                     |
| Berk, 2014[3]                | Unclear             | Unclear                | Low risk             | Low risk              | Unclear                             | Low risk                         | Unclear                       | Unclear                     |
| Farokhnia, 2013[4]           | Unclear             | Unclear                | Low risk             | Low risk              | Low risk                            | Low risk                         | Unclear                       | Low risk                    |
| Carmeli, 2012 [5]            | Unclear             | Unclear                | Low risk             | Low risk              | High risk                           | Unclear                          | Unclear                       | Unclear                     |
| Lavoie, 2008 [6]             | Unclear             | Unclear                | Low risk             | Low risk              | Unclear                             | Unclear                          | Unclear                       | Unclear                     |
| Berk, 2008[7]                | Low risk            | Low risk               | Low risk             | Low risk              | Low risk                            | Unclear                          | Unclear                       | Unclear                     |
| Afshar, 2012[8]              | Low risk            | Low risk               | Low risk             | Low risk              | Low risk                            | Low risk                         | Unclear                       | Unclear                     |
| Ghanizadeh, 2013[9]          | Low risk            | Low risk               | Low risk             | Low risk              | Low risk                            | Low risk                         | Unclear                       | Unclear                     |
| Bloch,2013[10]               | Unclear             | Low risk               | Low risk             | Low risk              | Unclear                             | Low risk                         | Unclear                       | Unclear                     |
| Grant, 2009 [11]             | Low risk            | Low risk               | Low risk             | Unclear               | Low risk                            | Unclear                          | Unclear                       | Unclear                     |
| Grant, 2007[12]              | High risk           | High risk              | High risk            | High risk             | Unclear                             | Unclear                          | Unclear                       | Unclear                     |
| LaRow, 2013[13]              | Unclear             | Unclear                | Unclear              | Unclear               | Low risk                            | Low risk                         | Unclear                       | Unclear                     |
| Gray, 2012[14]               | Low risk            | Low risk               | Low risk             | Low risk              | Low risk                            | Low risk                         | Unclear                       | Unclear                     |
| Grant,2010[15]               | Unclear             | Unclear                | Low risk             | Unclear               | Unclear                             | Unclear                          | Unclear                       | Unclear                     |
| Zheng, 2014[16]              | Low risk            | Low risk               | Low risk             | Low risk              | Low risk                            | Low risk                         | Unclear                       | Unclear                     |
| Tse, 2013[17]                | Unclear             | Low risk               | Low risk             | Low risk              | Unclear                             | Unclear                          | Low risk                      | Unclear                     |
| de Backer, 2013 [18]         | Unclear             | Unclear                | Unclear              | Unclear               | Unclear                             | Unclear                          | Unclear                       | Unclear                     |
| Patil, 2011[19]              | Unclear             | Unclear                | Low risk             | Low risk              | Unclear                             | Unclear                          | Unclear                       | Unclear                     |
| Stav, 2009 <sup>a</sup> [20] | Unclear             | Unclear                | Unclear              | Unclear               | Unclear                             | Unclear                          | Unclear                       | Unclear                     |
| Schermer, 2009[21]           | Low risk            | Low risk               | Low risk             | Low risk              | Unclear                             | Low risk                         | Low risk                      | Unclear                     |
| Decramer, 2005[22]           | Low risk            | Low risk               | Low risk             | Low risk              | Unclear                             | Low risk                         | Unclear                       | Low risk                    |
| de Benedetto, 2005[23]       | Unclear             | Unclear                | Unclear              | Unclear               | Unclear                             | Unclear                          | Unclear                       | Unclear                     |
| van Overveld, 2005[24]       | High risk           | High risk              | Unclear              | Unclear               | Unclear                             | Unclear                          | Unclear                       | Unclear                     |
| Kasielski, 2001[25]          | Unclear             | Unclear                | Unclear              | Unclear               | Low risk                            | Unclear                          | Unclear                       | Unclear                     |
| Pela, 1999 [26]              | Unclear             | Unclear                | Unclear              | Unclear               | Low risk                            | Low risk                         | Unclear                       | Unclear                     |

**Supplement table 5: Risk of bias assessment for studies reporting on long-term NAC use, con't**

| <b>Author, year</b>    | <b>Sequence generation</b> | <b>Allocation concealment</b> | <b>Blinding-participant</b> | <b>Blinding-investigator</b> | <b>Complete outcome data - side effect</b> | <b>Complete outcome data - withdraw</b> | <b>Complete outcome data - death</b> | <b>Selective outcome reporting</b> |
|------------------------|----------------------------|-------------------------------|-----------------------------|------------------------------|--------------------------------------------|-----------------------------------------|--------------------------------------|------------------------------------|
| Lukas, 2005[27]        | Unclear                    | Unclear                       | Low risk                    | Low risk                     | Unclear                                    | Unclear                                 | Unclear                              | Unclear                            |
| Hansen, 1994[28]       | Low risk                   | Unclear                       | Low risk                    | Unclear                      | Unclear                                    | Unclear                                 | Unclear                              | Unclear                            |
| Rasmussen, 1988[29]    | Low risk                   | Unclear                       | Unclear                     | Unclear                      | Low risk                                   | Low risk                                | Unclear                              | Unclear                            |
| Poder, 1984[30]        | Unclear                    | Unclear                       | Unclear                     | Unclear                      | Unclear                                    | Unclear                                 | Unclear                              | Unclear                            |
| McGavin, 1985[31]      | Low risk                   | Unclear                       | Unclear                     | Unclear                      | Low risk                                   | Low risk                                | Unclear                              | Unclear                            |
| Stafanger, 1989[32]    | Unclear                    | Unclear                       | Unclear                     | Unclear                      | Unclear                                    | Unclear                                 | Unclear                              | Unclear                            |
| Stafanger, 1988[33]    | Unclear                    | Unclear                       | Unclear                     | Unclear                      | Unclear                                    | Low risk                                | Unclear                              | Unclear                            |
| Ratjen, 1985[34]       | Low risk                   | Unclear                       | Low risk                    | Unclear                      | Unclear                                    | Low risk                                | Unclear                              | Unclear                            |
| Mitchell, 1982[35]     | Unclear                    | Low risk                      | Unclear                     | Unclear                      | Unclear                                    | Unclear                                 | Unclear                              | Unclear                            |
| Stafanger, 1988[33]    | Unclear                    | Unclear                       | Low risk                    | Low risk                     | Low risk                                   | Low risk                                | Unclear                              | Unclear                            |
| Martinez, 2014[36]     | Low risk                   | Unclear                       | Unclear                     | Unclear                      | Low risk                                   | Low risk                                | Low risk                             | Low risk                           |
| Demedts, 2005[37]      | Low risk                   | Low risk                      | Unclear                     | Unclear                      | Low risk                                   | Unclear                                 | Unclear                              | Low risk                           |
| Ghanei, 2008[38]       | Low risk                   | Low risk                      | Low risk                    | Low risk                     | Unclear                                    | Unclear                                 | Unclear                              | Unclear                            |
| Van Zandwijk, 2000[39] | Low risk                   | Unclear                       | Unclear                     | Unclear                      | Low risk                                   | Unclear                                 | Low risk                             | Unclear                            |
| Van Schooten, 2002[40] | Unclear                    | Unclear                       | Unclear                     | Unclear                      | Unclear                                    | Unclear                                 | Unclear                              | Unclear                            |
| Milazzo, 2010[41]      | High risk                  | Unclear                       | Unclear                     | Unclear                      | Low risk                                   | Unclear                                 | Unclear                              | Unclear                            |
| Spada, 2002[42]        | Unclear                    | Unclear                       | Unclear                     | Unclear                      | Unclear                                    | Unclear                                 | Unclear                              | Unclear                            |
| Breitkreutz, 2000[43]  | Low risk                   | Unclear                       | Low risk                    | Unclear                      | Unclear                                    | Low risk                                | Unclear                              | Unclear                            |
| Breitkreutz, 2000[43]  | Unclear                    | Low risk                      | Low risk                    | Low risk                     | Unclear                                    | Low risk                                | Low risk                             | Unclear                            |
| de Rosa, 2000[44]      | Low risk                   | Low risk                      | High risk                   | High risk                    | Low risk                                   | Low risk                                | Unclear                              | Unclear                            |
| Walmsley, 1998 [45]    | Unclear                    | Unclear                       | Unclear                     | Unclear                      | Unclear                                    | Unclear                                 | Unclear                              | Unclear                            |
| Look, 1998[46]         | Unclear                    | Unclear                       | Low risk                    | Unclear                      | High risk                                  | Unclear                                 | Unclear                              | Unclear                            |
| Neri, 2000[48]         | Unclear                    | Unclear                       | Unclear                     | Unclear                      | Unclear                                    | Unclear                                 | Unclear                              | Unclear                            |
| Look, 1999 [49]        | Unclear                    | Unclear                       | High risk                   | High risk                    | Unclear                                    | Unclear                                 | Unclear                              | Unclear                            |
| Ideo, 1999[50]         | Unclear                    | Unclear                       | High risk                   | High risk                    | Low risk                                   | Unclear                                 | Unclear                              | Unclear                            |
| Cimino, 1998[51]       | High risk                  | High risk                     | High risk                   | Unclear                      | Unclear                                    | Unclear                                 | Unclear                              | Unclear                            |

**Supplement table 5: Risk of bias assessment for studies reporting on long-term NAC use, con't**

| Author, year             | Sequence generation | Allocation concealment | Blinding-participant | Blinding-investigator | complete outcome data - side effect | complete outcome data - withdraw | complete outcome data - death | Selective outcome reporting |
|--------------------------|---------------------|------------------------|----------------------|-----------------------|-------------------------------------|----------------------------------|-------------------------------|-----------------------------|
| Tripi, 1998 [52]         | Low risk            | Unclear                | High risk            | Unclear               | Unclear                             | Unclear                          | Unclear                       | Unclear                     |
| Bernhard, 1998[53]       | Unclear             | Unclear                | Unclear              | Unclear               | High risk                           | High risk                        | Unclear                       | Unclear                     |
| Purwanto, 2012[54]       | Unclear             | Unclear                | Unclear              | Unclear               | Unclear                             | Unclear                          | Unclear                       | Unclear                     |
| Hashemi, 2012[55]        | Unclear             | Unclear                | Unclear              | Unclear               | Unclear                             | Unclear                          | Unclear                       | Unclear                     |
| Renke, 2010/2008 [56-57] | Low risk            | Low risk               | High risk            | High risk             | Unclear                             | Low risk                         | Unclear                       | Unclear                     |
| Nascimento, 2009[58]     | High risk           | Unclear                | Unclear              | Unclear               | Unclear                             | Low risk                         | Unclear                       | Unclear                     |
| Hsu, 2009[59]            | High risk           | High risk              | High risk            | High risk             | Unclear                             | Low risk                         | Unclear                       | Unclear                     |
| Tepel, 2003[60]          | Unclear             | Unclear                | Unclear              | Unclear               | Low risk                            | Unclear                          | Low risk                      |                             |
| Popora, 201[61]          | High risk           | High risk              | High risk            | Unclear               | Unclear                             | Unclear                          | Unclear                       | Unclear                     |
| Hashim, 2009[62]         | Low risk            | Low risk               | High risk            | High risk             | Unclear                             | Unclear                          | Unclear                       | Unclear                     |
| Elnashar, 2007[63]       | Unclear             | Unclear                | Unclear              | Unclear               | Unclear                             | Unclear                          | Unclear                       | Unclear                     |
| Shahin, 2009[64]         | Low risk            | Low risk               | Low risk             | Low risk              | Low risk                            | Low risk                         | Unclear                       | Unclear                     |
| Amin, 2008[65]           | Unclear             | Unclear                | Unclear              | Unclear               | Unclear                             | Unclear                          | Unclear                       | Unclear                     |
| Safarinejad, 2009        | Low risk            | Unclear                | Unclear              | Unclear               | Unclear                             | Low risk                         | Unclear                       | Unclear                     |
| Safarinejad, 2009[66]    | Unclear             | Unclear                | Unclear              | Unclear               | Unclear                             | Unclear                          | Unclear                       | Unclear                     |
| Ciftci, 2009[67]         | Unclear             | Low risk               | Low risk             | Low risk              | Unclear                             | Unclear                          | Unclear                       | Unclear                     |
| Lai, 2012[68]            | Low risk            | Unclear                | Unclear              | Unclear               | Unclear                             | Unclear                          | Unclear                       | Unclear                     |
| van Dieten, 2003[69]     | Low risk            | Low risk               | Low risk             | Low risk              | Unclear                             | Low risk                         | Unclear                       | Unclear                     |
| Perez, 2003[70]          | Unclear             | Unclear                | Unclear              | Unclear               | Unclear                             | Unclear                          | Unclear                       | Unclear                     |
| Yalcin, 2002[71]         | Unclear             | Unclear                | Unclear              | Unclear               | Unclear                             | Unclear                          | Unclear                       | Unclear                     |
| Currie, 1988[72]         | Low risk            | Unclear                | Low risk             | Unclear               | Unclear                             | Low risk                         | Unclear                       | Unclear                     |
| Kasperczyk, 2014[74]     | Unclear             | Unclear                | Unclear              | Unclear               | Unclear                             | Unclear                          | Unclear                       | Unclear                     |
| Dabirmoghaddam, 2013[75] | Low risk            | Low risk               | Low risk             | Low risk              | Unclear                             | Unclear                          | Unclear                       | Unclear                     |
| Khoshbaten, 2010[76]     | Unclear             | Low risk               | High risk            | High risk             | Unclear                             | Unclear                          | Unclear                       | Unclear                     |

**Supplement table 5: Risk of bias assessment for studies reporting on long-term NAC use, con't**

| <b>Author, year</b> | <b>Sequence generation</b> | <b>Allocation concealment</b> | <b>Blinding-participant</b> | <b>Blinding-investigator</b> | <b>Complete outcome data - side effect</b> | <b>Complete outcome data - withdraw</b> | <b>Complete outcome data - death</b> | <b>Selective outcome reporting</b> |
|---------------------|----------------------------|-------------------------------|-----------------------------|------------------------------|--------------------------------------------|-----------------------------------------|--------------------------------------|------------------------------------|
| Martina, 2008[77]   | Unclear                    | Unclear                       | Unclear                     | Unclear                      | Unclear                                    | Unclear                                 | Unclear                              | Unclear                            |
| Pace, 2003[78]      | Unclear                    | Unclear                       | Low risk                    | Unclear                      | Unclear                                    | Low risk                                | Unclear                              | Unclear                            |
| Adair, 2001[79]     | Unclear                    | Unclear                       | Low risk                    | Low risk                     | Low risk                                   | Low risk                                | Unclear                              | Unclear                            |
| Estensen, 1999[80]  | Unclear                    | Unclear                       | Low risk                    | Low risk                     | Unclear                                    | Low risk                                | Unclear                              | Unclear                            |
| de Flora, 1997[81]  | Low risk                   | Unclear                       | Low risk                    | Unclear                      | Low risk                                   | Unclear                                 | Unclear                              | Unclear                            |
| Ardissino, 1997[82] | Unclear                    | Unclear                       | Low risk                    | Unclear                      | Low risk                                   | Unclear                                 | Low risk                             | Unclear                            |

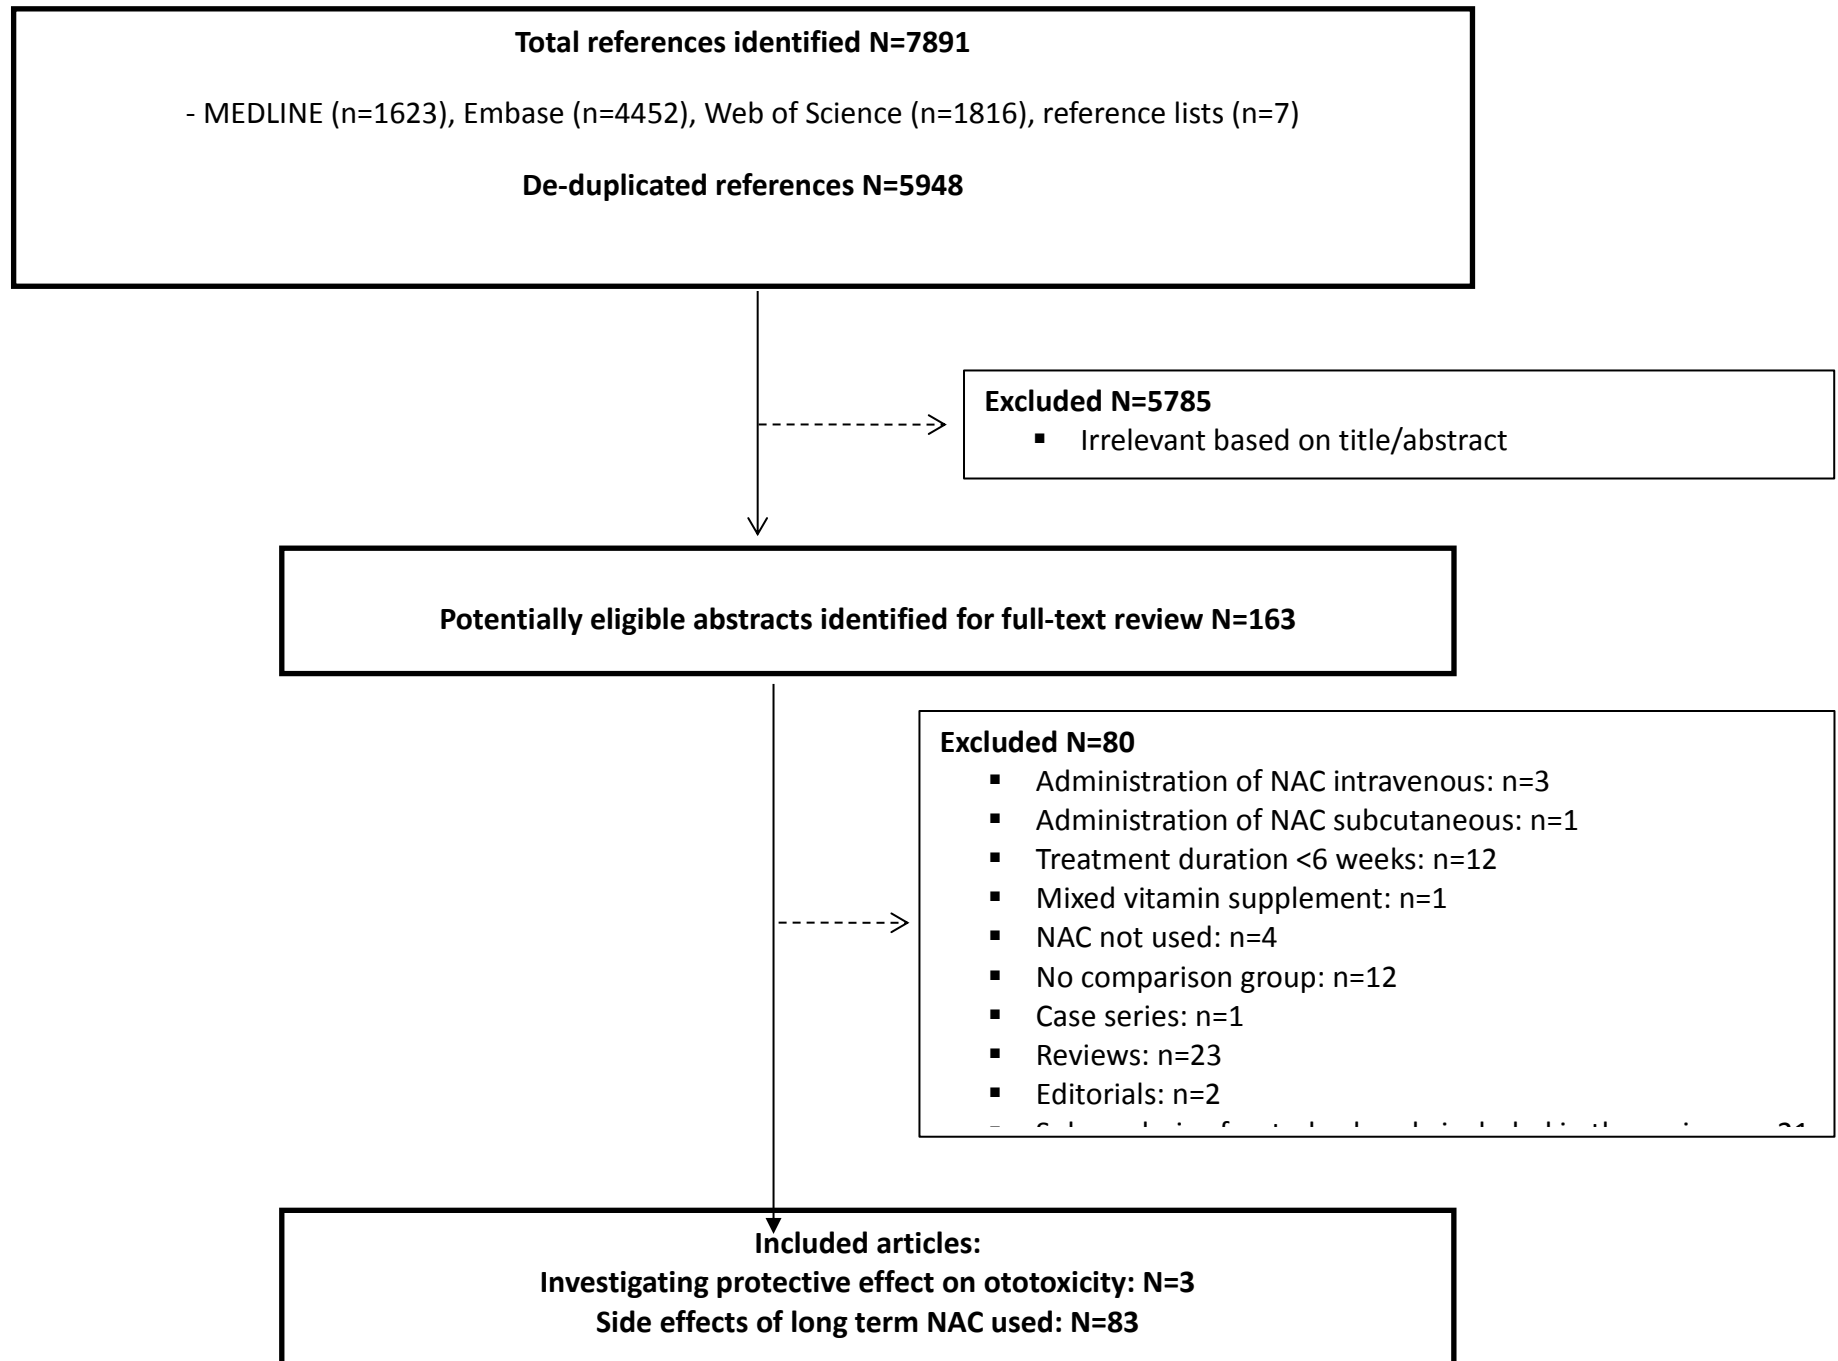

**Supplement figure 1: Selection process for the inclusion of studies**

## References

1. Berk M, Dean OM, Cotton SM, et al. Maintenance N-acetyl cysteine treatment for bipolar disorder: A double-blind randomized placebo controlled trial. *BMC Medicine* 2012; 10.
2. Berk M, Copolov DL, Dean O, et al. N-Acetyl Cysteine for Depressive Symptoms in Bipolar Disorder-A Double-Blind Randomized Placebo-Controlled Trial. *Biological Psychiatry* 2008; 64: 468-75.
3. Berk M, Dean OM, Cotton SM, et al. The Efficacy of Adjunctive N-Acetylcysteine in Major Depressive Disorder: A Double-Blind, Randomized, Placebo-Controlled Trial. *Journal of Clinical Psychiatry* 2014; 75: 628-U95.
4. Farokhnia M, Azarkolah A, Adinehfar F, et al. N-acetylcysteine as an adjunct to risperidone for treatment of negative symptoms in patients with chronic schizophrenia: A randomized, double-blind, placebo-controlled study. *Clinical Neuropharmacology* 2013; 36: 185-92.
5. Carmeli C, Knyazeva MG, Cuenod M, Do KQ. Glutathione precursor N-acetyl-cysteine modulates EEG synchronization in schizophrenia patients: A double-blind, randomized, placebo-controlled trial. *PLoS ONE* 2012; 7.
6. Lavoie S, Murray MM, Deppen P, et al. Glutathione precursor, N-acetyl-cysteine, improves mismatch negativity in schizophrenia patients. *Neuropsychopharmacology* 2008; 33: 2187-99.
7. Berk M, Copolov D, Dean O, et al. N-Acetyl Cysteine as a Glutathione Precursor for Schizophrenia-A Double-Blind, Randomized, Placebo-Controlled Trial. *Biological Psychiatry* 2008; 64: 361-8.
8. Afshar H, Roohafza H, Mohammad-Beigi H, et al. N-acetylcysteine add-on treatment in refractory obsessive-compulsive disorder: A randomized, double-blind, placebo-controlled trial. *Journal of Clinical Psychopharmacology* 2012; 32: 797-803.
9. Ghanizadeh A, Moghimi-Sarani E. A randomized double blind placebo controlled clinical trial of N-Acetylcysteine added to risperidone for treating autistic disorders. *BMC Psychiatry* 2013; 13.
10. Bloch MH, Panza KE, Grant JE, Pittenger C, Leckman JF. N-acetylcysteine in the treatment of pediatric trichotillomania: A randomized, double-blind, placebo-controlled add-on trial. *Journal of the American Academy of Child and Adolescent Psychiatry* 2013; 52: 231-40.
11. Grant JE, Odlaug BL, Kim SW, Suck WK. N-acetylcysteine, a glutamate modulator, in the treatment of trichotillomania: a double-blind, placebo-controlled study. *Archives of General Psychiatry* 2009; 66: 756-63.
12. Grant JE, Kim SW, Odlaug BL. N-Acetyl Cysteine, a Glutamate-Modulating Agent, in the Treatment of Pathological Gambling: A Pilot Study. *Biological Psychiatry* 2007; 62: 652-7.
13. LaRowe SD, Kalivas PW, Nicholas JS, Randall PK, Mardikian PN, Malcolm RJ. A double-blind placebo-controlled trial of N-acetylcysteine in the treatment of cocaine dependence. *American Journal on Addictions* 2013; 22: 443-52.
14. Gray KM, Carpenter MJ, Baker NL, et al. A double-blind randomized controlled trial of N-acetylcysteine in cannabis-dependent adolescents. *American Journal of Psychiatry* 2012; 169: 805-12.
15. Grant JE, Odlaug BL, Kim SW. A double-blind, placebo-controlled study of N-acetyl cysteine plus naltrexone for methamphetamine dependence. *European Neuropsychopharmacology* 2010; 20: 823-8.
16. Zheng JP, Wen FQ, Bai CX, et al. Twice daily N-acetylcysteine 600 mg for exacerbations of chronic obstructive pulmonary disease (PANTHEON): a randomised, double-blind placebo-controlled trial. *Lancet Respiratory Medicine* 2014; 2: 187-94.
17. Tse HN, Raiteri L, Wong KY, et al. High-dose N-acetylcysteine in stable COPD: The 1-year, double-blind, randomized, placebo-controlled HIACE study. *Chest* 2013; 144: 106-18.
18. De Backer J, Vos W, Van Holsbeke C, et al. Effect of high-dose N-acetylcysteine on airway geometry, inflammation, and oxidative stress in COPD patients. *International Journal of COPD* 2013; 8.
19. Patil AB, Kale AB, Singhal SS, Khan TA. Study of malondialdehyde as an indicator of oxidative stress and its modulation by N-acetylcysteine in chronic obstructive pulmonary disease. *Journal of Clinical and Diagnostic Research* 2011; 5: 48-51.
20. Stav D, Raz M. Effect of N-acetylcysteine on air trapping in COPD: A randomized placebo-controlled study. *Chest* 2009; 136: 381-6.
21. Schermer T, Chavannes N, Dekhuijzen R, et al. Fluticasone and N-acetylcysteine in primary care patients with COPD or chronic bronchitis. *Respiratory medicine* 2009; 103: 542-51.
22. Decramer M, Rutten-van Molken M, Dekhuijzen PNR. Effects of N-acetylcysteine on outcomes in chronic obstructive pulmonary disease (Bronchitis Randomized on NAC Cost-Utility Study, BRONCUS): a randomised placebo-controlled trial (vol 365, pg 1552, 2005). *Lancet* 2005; 366: 984.
23. De Benedetto F, Aceto A, Dragani B, et al. Long-term oral n-acetylcysteine reduces exhaled hydrogen peroxide in stable COPD. *Pulmonary Pharmacology and Therapeutics* 2005; 18: 41-7.

24. Van Overveld FJ, Demkow U, Gorecka D, De Backer WA, Zielinski J. New developments in the treatment of COPD: Comparing the effects of inhaled corticosteroids and N-acetylcysteine. *Journal of Physiology and Pharmacology* 2005; 56: 135-42.
25. Kasielski M, Nowak D. Long-term administration of N-acetylcysteine decreases hydrogen peroxide exhalation in subjects with chronic obstructive pulmonary disease. *Respiratory medicine* 2001; 95: 448-56.
26. Pela R, Calcagni AM, Subiaco S, Isidori P, Tubaldi A, Sanguinetti CM. N-acetylcysteine reduces the exacerbation rate in patients with moderate to severe COPD. *Respiration* 1999; 66: 495-500.
27. Lukas R, Scharling B, Schultze-Werninghaus G, Gillissen A. Administration of N-acetylcysteine and Vitamin C to augment antioxidant protection in patients with chronic bronchitis. [German]. *Deutsche medizinische Wochenschrift* 2005; 130: 563-7.
28. Hansen NCG, Skriver A, Brorsen-Riis L, et al. Orally administered N-acetylcysteine may improve general well-being in patients with mild chronic bronchitis. *Respiratory medicine* 1994; 88: 531-5.
29. Rasmussen JB, Glennow C. Reduction in days of illness after long-term treatment with N-acetylcysteine controlled-release tablets in patients with chronic bronchitis. *European Respiratory Journal* 1988; 1: 351-5.
30. Poder G, Puskas J, Kelemen J. Acetylcysteine in chronic obstructive bronchitis. [German]. *Therapiewoche* 1984; 34: 7047-52.
31. Anonymous, McGavin CR, Prescott RJ, Nariman S, Macfarlane JT. Oral N-acetylcysteine and exacerbation rates in patients with chronic bronchitis and severe airways obstruction. *Thorax* 1985; 40: 832-5.
32. Stafanger G, Koch C. N-acetylcysteine in cystic fibrosis and *Pseudomonas aeruginosa* infection: clinical score, spirometry and ciliary motility. *European Respiratory Journal* 1989; 2: 234-7.
33. Stafanger G, Garne S, Howitz P, Morkassel E, Koch C. The clinical effect and the effect on the ciliary motility of oral N-acetylcysteine in patients with cystic fibrosis and primary ciliary dyskinesia. *European Respiratory Journal* 1988; 1: 161-7.
34. Ratjen F, Wonne R, Posselt HG, Stover B, Hofmann D, Bender SW. A double-blind placebo controlled trial with oral ambroxol and N-acetylcysteine for mucolytic treatment in cystic fibrosis. *European Journal of Pediatrics* 1985; 144: 374-8.
35. Mitchell EA, Elliott RB. Controlled trial of oral N-acetylcysteine in cystic fibrosis. *Australian Paediatric Journal* 1982; 18: 40-2.
36. Martinez FJ, de Andrade JA, Anstrom KJ, King TE, Raghu G, Idiopathic Pulm Fibrosis C. Randomized Trial of Acetylcysteine in Idiopathic Pulmonary Fibrosis. *New England Journal of Medicine* 2014; 370: 2093-101.
37. Demedts M, Behr J, Buhl R, et al. High-dose acetylcysteine in idiopathic pulmonary fibrosis. *New England Journal of Medicine* 2005; 353: 2229-42.
38. Ghanei M, Shohrati M, Jafari M, Ghaderi S, Alaeddini F, Aslani J. N-acetylcysteine improves the clinical conditions of mustard gas-exposed patients with normal pulmonary function test. *Basic and Clinical Pharmacology and Toxicology* 2008; 103: 428-32.
39. van Zandwijk N, Dalesio O, Pastorino U, de Vries N, van Tinteren H. EUROSCAN, a randomized trial of vitamin A and N-acetylcysteine in patients with head and neck cancer or lung cancer. For the European Organization for Research and Treatment of Cancer Head and Neck and Lung Cancer Cooperative Groups. *Journal of the National Cancer Institute* 2000; 92: 977-86.
40. Van Schooten FJ, Nia AB, De Flora S, et al. Effects of oral administration of N-Acetyl-L-cysteine: A multi-biomarker study in smokers. *Cancer Epidemiology Biomarkers and Prevention* 2002; 11: 167-75.
41. Milazzo L, Menzaghi B, Caramma I, et al. Effect of antioxidants on mitochondrial function in HIV-1-related lipoatrophy: A pilot study. *AIDS Research and Human Retroviruses* 2010; 26: 1207-14.
42. Spada C, Treitinger A, Reis M, et al. The effect of N-acetylcysteine supplementation upon viral load, CD4, CD8, total lymphocyte count and hematocrit in individuals undergoing antiretroviral treatment. *Clinical Chemistry & Laboratory Medicine* 2002; 40: 452-5.
43. Breitzkreutz R, Pittack N, Nebe CT, et al. Improvement of immune functions in HIV infection by sulfur supplementation: Two randomized trials. *Journal of Molecular Medicine* 2000; 78: 55-62.
44. De Rosa SC, Zaretsky MD, Dubs JG, et al. N-acetylcysteine replenishes glutathione in HIV infection. *European Journal of Clinical Investigation* 2000; 30: 915-29.
45. Walmsley SL, Khorasheh S, Singer J, Djurdjev O. A randomized trial of N-acetylcysteine for prevention of trimethoprim- sulfamethoxazole hypersensitivity reactions in pneumocystis carinii Pneumonia prophylaxis (CTN 057). *Journal of Acquired Immune Deficiency Syndromes and Human Retrovirology* 1998; 19: 498-505.
46. Look MP, Rockstroh JK, Rao GS, et al. Sodium selenite and N-acetylcysteine in antiretroviral-naïve HIV-1-infected patients: a randomized, controlled pilot study. *European Journal of Clinical Investigation* 1998; 28: 389-97.



47. Grant PR, Black A, Garcia N, Prieto J, Garson JA. Combination therapy with interferon-alpha plus N-acetyl cysteine for chronic hepatitis C: A placebo controlled double-blind multicentre study. *Journal of Medical Virology* 2000; 61: 439-42.
48. Neri S, Ierna D, Antoci S, Campanile E, D'Amico RA, Noto R. Association of alpha-interferon and acetyl cysteine in patients with chronic C hepatitis. *Panminerva medica* 2000; 42: 187-92.
49. Look MP, Gerard A, Rao GS, et al. Interferon/antioxidant combination therapy for chronic hepatitis C--a controlled pilot trial. *Antiviral Research* 1999; 43: 113-22.
50. Ideo G, Bellobuono A, Tempini S, et al. Antioxidant drugs combined with alpha-interferon in chronic hepatitis C not responsive to alpha-interferon alone: A randomized, multicentre study. *European Journal of Gastroenterology & Hepatology* 1999; 11: 1203-7.
51. Cimino L, Belisario MA, Intrieri M, et al. Effect of N-acetyl-cysteine on lymphomonocyte glutathione and response to interferon treatment in C-virus chronic hepatitis. *Italian Journal of Gastroenterology and Hepatology* 1998; 30: 189-93.
52. Tripi S, Di Gaetano C, Soresi M, et al. Acetylcysteine therapy for chronic hepatitis C. Are its effects synergistic with interferon alpha? A pilot study. *Clinical Drug Investigation* 1998; 16: 297-302.
53. Bernhard MC, Junker E, Hettinger A, Lauterburg BH. Time course of total cysteine, glutathione and homocysteine in plasma of patients with chronic hepatitis C treated with interferon-alpha with and without supplementation with N-acetylcysteine. *Journal of Hepatology* 1998; 28: 751-5.
54. Purwanto B, Prasetyo DH. Effect of oral N-acetylcysteine treatment on immune system in continuous ambulatory peritoneal dialysis patients. *Acta medica Indonesiana* 2012; 44: 140-4.
55. Hashemi SR, Noshad H, Tabrizi A, et al. Angiotensin receptor blocker and N-Acetyl Cysteine for reduction of proteinuria in patients with type 2 diabetes mellitus. *Iranian Journal of Kidney Diseases* 2012; 6: 39-43.
56. Renke M, Tylicki L, Rutkowski P, et al. The effect of N-acetylcysteine on proteinuria and markers of tubular injury in non-diabetic patients with chronic kidney disease: A placebo-controlled, randomized, open, cross-over study. *Kidney and Blood Pressure Research* 2008; 31: 404-10.
57. Renke M, Tylicki L, Rutkowski P, et al. The effect of N-acetylcysteine on blood pressure and markers of cardiovascular risk in non-diabetic patients with chronic kidney disease: A placebo-controlled, randomized, cross-over study. *Medical Science Monitor* 2010; 16: 13-8.
58. Nascimento MM, Suliman ME, Silva M, et al. Effect of oral N-acetylcysteine treatment on plasma inflammatory and oxidative stress markers in peritoneal dialysis patients: A placebo-controlled study. *Peritoneal Dialysis International* 2010; 30: 336-42.
59. Hsue PY, Hunt PW, Wu Y, et al. Association of abacavir and impaired endothelial function in treated and suppressed HIV-infected patients. *AIDS* 2009; 23(15): 2021-7.
60. Tepel M, van der Giet M, Statz M, Jankowski J, Zidek W. The antioxidant acetylcysteine reduces cardiovascular events in patients with end-stage renal failure: a randomized, controlled trial. *Circulation* 2003; 107(7): 992-5.
61. Porpora MG, Brunelli R, Costa G, et al. A promise in the treatment of endometriosis: An observational cohort study on ovarian endometrioma reduction by N-acetylcysteine. *Evidence based Complementary and Alternative Medicine* 2013; 240702.
62. Abu Hashim H, Anwar K, Abd El-Fatah R, et al. N-acetyl cysteine plus clomiphene citrate versus metformin and clomiphene citrate in treatment of clomiphene-resistant polycystic ovary syndrome: a randomized controlled trial. *Journal of Women's Health* 2013; 19: 2043-8.
63. Elnashar A, Fahmy M, Mansour A, Ibrahim K. N-acetyl cysteine vs. metformin in treatment of clomiphene citrate-resistant polycystic ovary syndrome: a prospective randomized controlled study. *Fertil Steril* 2007; 88(2): 406-9.
64. Shahin AY, Hassanin IMA, Ismail AM, Kruessel JS, Hirchenhain J. Effect of oral N-acetyl cysteine on recurrent preterm labor following treatment for bacterial vaginosis. *International Journal of Gynecology and Obstetrics* 2009; 104: 44-8.
65. Amin AF, Shaaban OM, Bediawy MA. N-acetyl cysteine for treatment of recurrent unexplained pregnancy loss. *Reproductive BioMedicine Online* 2008; 17: 722-6.
66. Safarinejad MR, Safarinejad S. Efficacy of Selenium and/or N-Acetyl-Cysteine for Improving Semen Parameters in Infertile Men: A Double-Blind, Placebo Controlled, Randomized Study. *Journal of Urology* 2009; 181: 741-51.
67. Ciftci H, Verit A, Savas M, Yeni E, Erel O. Effects of N-acetylcysteine on Semen Parameters and Oxidative/Antioxidant Status. *Urology* 2009; 74: 73-6.

68. Lai ZW, Hanczko R, Bonilla E, et al. N-Acetylcysteine Reduces Disease Activity by Blocking Mammalian Target of Rapamycin in T Cells From Systemic Lupus Erythematosus Patients A Randomized, Double-Blind, Placebo-Controlled Trial. *Arthritis and Rheumatism* 2012; 64: 2937-46.
69. Van Dieten HEM, Perez RSGM, Van Tulder MW, et al. Cost effectiveness and cost utility of acetylcysteine versus dimethyl sulfoxide for reflex sympathetic dystrophy. *Pharmacoeconomics* 2003; 21: 139-48.
70. Perez RSGM, Zuurmond WWA, Bezemer PD, et al. The treatment of complex regional pain syndrome type I with free radical scavengers: a randomized controlled study. *Pain* 2003; 102: 297-307.
71. Yalcin E, Altin F, Cinhuseyinoglu F, Arslan MO. N-acetylcysteine in chronic blepharitis. *Cornea* 2002; 21: 164-8.
72. Currie DC, Greenstone M, Pavia D, et al. Efficacy of 'mucoregulatory' agents in Young's syndrome. *Thorax* 1988; 43: 480-1.
73. Furst DE, Clements PJ, Harris R, Ross M, Levy J, Paulus HE. Measurement of clinical change in progressive systemic sclerosis: a 1 year double-blind placebo-controlled trial of N-acetylcysteine. *Annals of the Rheumatic Diseases* 1979; 38: 356-61.
74. Kasperczyk S, Dobrakowski M, Kasperczyk A, et al. Effect of treatment with N-acetylcysteine on non-enzymatic antioxidant reserves and lipid peroxidation in workers exposed to lead. *Annals of Agricultural and Environmental Medicine* 2014; 21: 272-7.
75. Dabirmoghaddam P, Amali A, Langroudi MM, Fard MRS, Hejazi M, Razavi MS. The effect of N-acetyl Cysteine on laryngopharyngeal reflux. *Acta Medica Iranica* 2013; 51: 757-64.
76. Khoshbaten M, Aliasgarzadeh A, Masnadi K, et al. N-acetylcysteine improves liver function in patients with non-alcoholic fatty liver disease. *Hepatitis Monthly* 2010; 10: 12-6.
77. Martina V, Masha A, Gigliardi VR, et al. Long-term n-acetylcysteine and l-arginine administration reduces endothelial activation and systolic blood pressure in hypertensive patients with type 2 diabetes. *Diabetes Care* 2008; 31: 940-4.
78. Pace BS, Shartava A, Pack-Mabien A, Mulekar M, Ardia A, Goodman SR. Effects of N-acetylcysteine on dense cell formation in sickle cell disease. *American Journal of Hematology* 2003; 73: 26-32.
79. Adair JC, Knoefel JE, Morgan N. Controlled trial of N-acetylcysteine for patients with probable Alzheimer's disease. *Neurology* 2001; 57: 1515-7.
80. Estensen RD, Levy M, Klopp SJ, et al. N-Acetylcysteine suppression of the proliferative index in the colon of patients with previous adenomatous colonic polyps. *Cancer Letters* 1999; 147: 109-14.
81. De Flora S, Grassi C, Carati L. Attenuation of influenza-like symptomatology and improvement of cell-mediated immunity with long-term N-acetylcysteine treatment. *European Respiratory Journal* 1997; 10: 1535-41.
82. Ardissino D, Merlini PA, Savonitto S, et al. Effect of transdermal nitroglycerin or N-acetylcysteine, or both, in the long-term treatment of unstable angina pectoris. *Journal of the American College of Cardiology* 1997; 29: 941-7.
